# Supplementary material for: COPD-derived fibroblasts secrete higher levels of senescence-associated secretory phenotype proteins
Source: HighWire-hosted journal article supplement (doi:10.1136/thoraxjnl-2020-215114), 2020-12-03
Supplement: thoraxjnl-2020-215114supp001_data_supplement.pdf [file thoraxjnl-2020-215114supp001_data_supplement.pdf]

## **COPD-derived fibroblasts secrete higher levels of senescence-associated secretory phenotype proteins**

### **Online Supplement**

### **Complete methods**

#### **Subjects**

Primary lung fibroblasts from subjects undergoing lung transplantation or tumour resection surgery were used. Resected lung tissue was isolated distal from the tumour and was macroscopically and histologically normal. Primary parenchymal lung fibroblasts were isolated and cultured as described before [1]. Briefly, parenchymal lung tissue was cut into small cubes and cultured in 12-wells plates in Ham's F12 medium supplemented with 10% foetal calf serum (FCS), 2mM L-Glutamine, 100µg/ml Streptomycin and 100U/ml penicillin at 37°C and 5% CO<sub>2</sub>. Medium was refreshed every week and after four weeks fibroblasts were trypsinized and placed into 25 cm<sup>2</sup> flasks. When cultures reached confluency, fibroblasts were frozen and stored in liquid nitrogen. The following inclusion criteria were used:

- 1) SEO-COPD patients; FEV1/FVC <70% and FEV1 <30%pred measured at an age <53 (according to [2]) and with age <56 at time of lung transplant surgery
- 2) non-COPD control subjects (SEO-COPD-matched); FEV1/FVC >70%, age <60 at time of surgery
- 3) Older, mild-moderate, COPD patients; FEV1/FVC <70% and FEV1 30-80%pred, age >65 at time of surgery
- 4) non-COPD control subjects (Older COPD-matched); FEV1/FVC >70%, age >65 at time of surgery

None of the COPD patients was alpha-1 antitrypsin deficient. To get sufficient SEO-COPD-matched non-COPD control subjects, subjects at an age <60 at the time of surgery were included, taken into account the age-matching with the SEO-COPD group.

The study protocol was consistent with the Research Code of the University Medical Centre Groningen and national ethical and professional guidelines ("Code of conduct; Dutch federation of biomedical scientific societies", <http://www.federa.org>). Lung fibroblasts and lung tissues used in this study are derived from left-over lung material after lung surgery and transplant procedures. This material was not subject to the act on medical research involving human subjects in the Netherlands and therefore an ethics waiver was provided by the Medical Ethical Committee of the University Medical Centre Groningen (METc UMCG). All samples and clinical information were de-identified before experiments were performed.

#### **Primary parenchymal lung fibroblast culture**

The primary parenchymal lung fibroblasts were defrosted and cultured in batches of four, including fibroblasts from each subgroup in equal numbers, as described before [1]. At passage 5, 25000 fibroblasts were seeded in Ham's F12 medium + 5% FCS in 12-well plates and after two days treated with or without 250 µM Paraquat dichloride hydrate (PQ) (Sigma-Aldrich, Zwijndrecht, the Netherlands) for 24 hours to induce cellular senescence [3]. After 24 hours, PQ was removed and cells were kept in culture for four days in Ham's F12 medium + 5% FCS. These time-points were carefully chosen based on pilot study results.

**Olink Proteomics**

The highly sensitive Olink Proteomics (Olink Proteomics, Uppsala, Sweden) panels *Inflammation* and *Cardiovascular III*, were used to measure the secretion of 184 proteins, whereof 165 proteins passed QC. The Olink Proteomics analysis uses an antibody-based method called Proximity Extension Assay technology. Briefly, oligonucleotide-labelled antibody pairs bind the target protein and when oligonucleotides are in close proximity, these hybridize and get extended by a DNA polymerase. This created DNA barcode is amplified and quantified by qPCR. A full explanation about this analysis can be found on their website: <https://www.olink.com/data-you-can-trust/technology/>. Levels of secreted proteins were corrected for total cell numbers four days after senescence induction.

**Secreted protein analyses**

Cell-free supernatants were harvested four days after PQ removal and stored in -80°C prior to analyses. Secreted IL-8 levels were measured using Human DuoSet ELISA (R&D Systems, Abingdon, United Kingdom). As the numbers of cells were different at the end of culture between COPD and control-derived fibroblasts, and between untreated and PQ-treated, we corrected the secreted protein levels for cell numbers counted at the end of culture.

**Statistical analyses**

SPSS software was used for the statistical analyses. Significant differences between PQ treated and untreated cells were tested using Wilcoxon signed-rank test adjusted for multiple testing using Benjamini-Hochberg. Proteins were defined as SASP protein when a significant (FDR <0.05)  $\geq 3$ -fold increase in secretion was observed upon PQ treatment. Next, statistical differences in SASP protein secretion between untreated COPD- and control-derived fibroblasts were tested using Mann-Whitney U. FDR  $P < 0.05$  was considered statistically significant.

**Table S1: Overview of all 124 defined SASP proteins**

| PROTEIN   | FOLD CHANGE | P-VALUE   | FDR       | DESCRIBED OR NOVEL?  |
|-----------|-------------|-----------|-----------|----------------------|
| GDF-15    | 9.331       | 5.255E-08 | 7.226E-08 | SASP Atlas           |
| GDNF      | 8.946       | 5.255E-08 | 7.226E-08 | Potentially novel    |
| CCL3      | 6.695       | 5.683E-08 | 7.442E-08 | SASP Atlas           |
| TGF-ALPHA | 5.737       | 5.255E-08 | 7.226E-08 | Potentially novel    |
| OPN       | 5.129       | 5.255E-08 | 7.226E-08 | Potentially novel    |
| TNFRSF10C | 5.017       | 5.253E-08 | 7.226E-08 | Previously described |
| 4E-BP1    | 4.776       | 5.255E-08 | 7.226E-08 | SASP Atlas           |
| IL13      | 4.668       | 5.255E-08 | 7.226E-08 | Previously described |
| KLK6      | 4.651       | 5.253E-08 | 7.226E-08 | Potentially novel    |
| CCL19     | 4.636       | 5.253E-08 | 7.226E-08 | SASP protein family  |
| FGF-19    | 4.621       | 5.253E-08 | 7.226E-08 | SASP protein family  |
| IL10      | 4.564       | 5.255E-08 | 7.226E-08 | Previously described |
| EP-CAM    | 4.490       | 9.008E-07 | 1.047E-06 | Potentially novel    |
| TFF3      | 4.486       | 5.255E-08 | 7.226E-08 | Potentially novel    |
| CCL16     | 4.484       | 5.255E-08 | 7.226E-08 | Previously described |
| RETN      | 4.459       | 5.255E-08 | 7.226E-08 | Potentially novel    |
| IL-17C    | 4.455       | 5.255E-08 | 7.226E-08 | Previously described |
| GAL-4     | 4.435       | 5.255E-08 | 7.226E-08 | Potentially novel    |
| CASP-8    | 4.409       | 5.255E-08 | 7.226E-08 | Potentially novel    |
| CD5       | 4.387       | 5.255E-08 | 7.226E-08 | Potentially novel    |
| CCL23     | 4.379       | 5.253E-08 | 7.226E-08 | SASP protein family  |
| IL4       | 4.373       | 5.255E-08 | 7.226E-08 | Previously described |
| CCL15     | 4.370       | 5.253E-08 | 7.226E-08 | SASP protein family  |
| SPON1     | 4.359       | 5.255E-08 | 7.226E-08 | Potentially novel    |
| CASP-3    | 4.351       | 5.253E-08 | 7.226E-08 | Previously described |
| IGFBP-1   | 4.350       | 5.255E-08 | 7.226E-08 | SASP protein family  |
| RANKL     | 4.346       | 5.255E-08 | 7.226E-08 | Potentially novel    |
| IL-20     | 4.335       | 5.255E-08 | 7.226E-08 | SASP protein family  |
| ST1A1     | 4.332       | 5.255E-08 | 7.226E-08 | Potentially novel    |
| IL-10RA   | 4.331       | 5.255E-08 | 7.226E-08 | SASP protein family  |
| CDH5      | 4.330       | 5.255E-08 | 7.226E-08 | Potentially novel    |
| CXCL9     | 4.328       | 5.255E-08 | 7.226E-08 | SASP protein family  |
| CD8A      | 4.322       | 5.253E-08 | 7.226E-08 | Potentially novel    |
| CCL24     | 4.321       | 5.255E-08 | 7.226E-08 | SASP protein family  |
| AP-N      | 4.320       | 5.255E-08 | 7.226E-08 | SASP Atlas           |
| TNFSF14   | 4.316       | 5.255E-08 | 7.226E-08 | SASP protein family  |
| TNFB      | 4.316       | 5.255E-08 | 7.226E-08 | SASP protein family  |
| STAMBP    | 4.311       | 5.253E-08 | 7.226E-08 | Potentially novel    |
| IL-17A    | 4.309       | 5.253E-08 | 7.226E-08 | Previously described |
| PON3      | 4.309       | 5.255E-08 | 7.226E-08 | Potentially novel    |
| IL-2RB    | 4.308       | 5.255E-08 | 7.226E-08 | SASP protein family  |
| PGLYRP1   | 4.305       | 5.255E-08 | 7.226E-08 | Potentially novel    |
| IL-17RA   | 4.302       | 5.255E-08 | 7.226E-08 | SASP protein family  |

|            |       |           |           |                      |
|------------|-------|-----------|-----------|----------------------|
| CCL4       | 4.301 | 5.255E-08 | 7.226E-08 | SASP protein family  |
| CD163      | 4.301 | 5.255E-08 | 7.226E-08 | Potentially novel    |
| MEPE       | 4.287 | 5.255E-08 | 7.226E-08 | Potentially novel    |
| FGF-23     | 4.278 | 5.251E-08 | 7.226E-08 | SASP protein family  |
| MPO        | 4.271 | 5.255E-08 | 7.226E-08 | Previously described |
| IL-24      | 4.269 | 5.255E-08 | 7.226E-08 | SASP protein family  |
| IL-1 ALPHA | 4.262 | 3.782E-07 | 4.588E-07 | Previously described |
| PSP-D      | 4.249 | 5.255E-08 | 7.226E-08 | Potentially novel    |
| CCL28      | 4.247 | 5.255E-08 | 7.226E-08 | SASP protein family  |
| SELP       | 4.239 | 5.255E-08 | 7.226E-08 | Potentially novel    |
| LIF-R      | 4.225 | 5.253E-08 | 7.226E-08 | Potentially novel    |
| TNFRSF14   | 4.224 | 5.255E-08 | 7.226E-08 | SASP protein family  |
| VWF        | 4.217 | 5.255E-08 | 7.226E-08 | Potentially novel    |
| SIRT2      | 4.214 | 5.253E-08 | 7.226E-08 | Potentially novel    |
| AZU1       | 4.212 | 5.253E-08 | 7.226E-08 | Potentially novel    |
| FGF-21     | 4.211 | 5.255E-08 | 7.226E-08 | SASP protein family  |
| CD6        | 4.190 | 5.255E-08 | 7.226E-08 | Potentially novel    |
| MMP-9      | 4.183 | 5.255E-08 | 7.226E-08 | SASP Atlas           |
| CCL25      | 4.182 | 5.255E-08 | 7.226E-08 | Previously described |
| SCGB3A2    | 4.179 | 5.253E-08 | 7.226E-08 | Potentially novel    |
| TR         | 4.175 | 5.253E-08 | 7.226E-08 | SASP Atlas           |
| CPA1       | 4.172 | 5.253E-08 | 7.226E-08 | Potentially novel    |
| CD244      | 4.168 | 5.255E-08 | 7.226E-08 | Potentially novel    |
| PECAM-1    | 4.166 | 5.255E-08 | 7.226E-08 | Potentially novel    |
| TNF        | 4.166 | 5.251E-08 | 7.226E-08 | Previously described |
| NOTCH 3    | 4.159 | 5.253E-08 | 7.226E-08 | Potentially novel    |
| IL-22 RA1  | 4.153 | 5.255E-08 | 7.226E-08 | SASP protein family  |
| OSM        | 4.151 | 5.251E-08 | 7.226E-08 | Potentially novel    |
| TR-AP      | 4.141 | 5.255E-08 | 7.226E-08 | Potentially novel    |
| IL-20RA    | 4.129 | 5.255E-08 | 7.226E-08 | SASP protein family  |
| IL-1RT2    | 4.125 | 5.255E-08 | 7.226E-08 | SASP protein family  |
| EN-RAGE    | 4.121 | 4.070E-07 | 4.831E-07 | Potentially novel    |
| NRTN       | 4.114 | 5.255E-08 | 7.226E-08 | Potentially novel    |
| IL2        | 4.105 | 5.253E-08 | 7.226E-08 | Previously described |
| ADA        | 4.097 | 5.253E-08 | 7.226E-08 | Potentially novel    |
| IFN-GAMMA  | 4.095 | 5.255E-08 | 7.226E-08 | Previously described |
| U-PAR      | 4.093 | 5.255E-08 | 7.226E-08 | SASP Atlas           |
| ICAM-2     | 4.090 | 5.255E-08 | 7.226E-08 | Potentially novel    |
| AXIN1      | 4.089 | 5.255E-08 | 7.226E-08 | Potentially novel    |
| TIMP4      | 4.081 | 5.253E-08 | 7.226E-08 | SASP protein family  |
| CHIT1      | 4.078 | 5.255E-08 | 7.226E-08 | Potentially novel    |
| CPB1       | 4.068 | 5.255E-08 | 7.226E-08 | Potentially novel    |
| GP6        | 4.050 | 5.255E-08 | 7.226E-08 | Potentially novel    |
| ARTN       | 4.048 | 5.255E-08 | 7.226E-08 | Potentially novel    |
| VEGFA      | 4.047 | 5.255E-08 | 7.226E-08 | Previously described |
| IL18       | 4.025 | 9.669E-07 | 1.101E-06 | SASP Atlas           |

|           |       |           |           |                      |
|-----------|-------|-----------|-----------|----------------------|
| DNER      | 4.018 | 5.255E-08 | 7.226E-08 | Potentially novel    |
| TSLP      | 3.994 | 5.255E-08 | 7.226E-08 | Potentially novel    |
| IL33      | 3.989 | 5.255E-08 | 7.226E-08 | SASP protein family  |
| IL5       | 3.985 | 5.255E-08 | 7.226E-08 | SASP protein family  |
| PDGFA     | 3.950 | 5.255E-08 | 7.226E-08 | Previously described |
| SHPS-1    | 3.948 | 5.255E-08 | 7.226E-08 | Potentially novel    |
| CD93      | 3.944 | 5.253E-08 | 7.226E-08 | Potentially novel    |
| ST2       | 3.938 | 5.255E-08 | 7.226E-08 | SASP protein family  |
| IL2-RA    | 3.912 | 5.253E-08 | 7.226E-08 | SASP protein family  |
| LTBR      | 3.896 | 5.255E-08 | 7.226E-08 | Potentially novel    |
| PCSK9     | 3.847 | 5.255E-08 | 7.226E-08 | Potentially novel    |
| SELE      | 3.833 | 5.251E-08 | 7.226E-08 | Potentially novel    |
| IL-18BP   | 3.785 | 5.255E-08 | 7.226E-08 | SASP protein family  |
| IL-15RA   | 3.781 | 5.255E-08 | 7.226E-08 | SASP protein family  |
| EPHB4     | 3.756 | 5.253E-08 | 7.226E-08 | Potentially novel    |
| TNFRSF9   | 3.736 | 5.255E-08 | 7.226E-08 | SASP protein family  |
| TLT-2     | 3.680 | 5.255E-08 | 7.226E-08 | Potentially novel    |
| FABP4     | 3.667 | 5.255E-08 | 7.226E-08 | Previously described |
| NT-PROBNP | 3.666 | 5.255E-08 | 7.226E-08 | Potentially novel    |
| GAL-3     | 3.548 | 5.253E-08 | 7.226E-08 | SASP Atlas           |
| CX3CL1    | 3.547 | 5.683E-08 | 7.442E-08 | Previously described |
| BETA-NGF  | 3.487 | 5.255E-08 | 7.226E-08 | Previously described |
| IL-10RB   | 3.474 | 5.255E-08 | 7.226E-08 | SASP protein family  |
| SCF       | 3.449 | 5.255E-08 | 7.226E-08 | Previously described |
| CCL20     | 3.442 | 1.196E-06 | 1.351E-06 | Previously described |
| IL-18R1   | 3.440 | 5.255E-08 | 7.226E-08 | SASP protein family  |
| T-PA      | 3.424 | 5.683E-08 | 7.442E-08 | SASP Atlas           |
| CXCL11    | 3.302 | 5.255E-08 | 7.226E-08 | Previously described |
| TNF-R2    | 3.263 | 5.253E-08 | 7.226E-08 | Previously described |
| IL-12B    | 3.259 | 5.253E-08 | 7.226E-08 | SASP protein family  |
| PD-L1     | 3.166 | 5.255E-08 | 7.226E-08 | Potentially novel    |
| CTSZ      | 3.100 | 5.255E-08 | 7.226E-08 | SASP Atlas           |
| FGF-5     | 3.042 | 5.255E-08 | 7.226E-08 | SASP protein family  |
| CXCL16    | 3.029 | 5.255E-08 | 7.226E-08 | SASP protein family  |
| CD40      | 3.011 | 4.070E-07 | 4.831E-07 | Previously described |

- *Fold change: Median of fold changes between PQ treated and untreated primary lung fibroblasts.*
- *P-value: tested using Wilcoxon signed-rank tests.*
- *FDR: P-value adjusted for multiple testing using Benjamini-Hochberg correction.*
- *Last column describes overlap with SASP Atlas [4], PubMed search for previously described, and protein families of described SASP proteins [5].*

Table S2: Overview of all 42 COPD associated SASP proteins

| PROTEIN | COPD VS CONTROLS |         |               | SEO-COPD VS MATCHED CONTROLS |         |               | OLDER, MM COPD VS MATCHED CONTROLS |         |        |
|---------|------------------|---------|---------------|------------------------------|---------|---------------|------------------------------------|---------|--------|
|         | FC               | P-value | FDR           | FC                           | P-value | FDR           | FC                                 | P-value | FDR    |
| RANKL   | 1.6630           | 0.0054  | <b>0.0379</b> | 1.4804                       | 0.0193  | <b>0.0379</b> | 1.6704                             | 0.0783  | 0.1820 |
| FABP4   | 1.5049           | 0.0018  | <b>0.0379</b> | 1.4286                       | 0.0071  | <b>0.0375</b> | 1.3885                             | 0.1809  | 0.2111 |
| IGFBP-1 | 1.4742           | 0.0113  | <b>0.0450</b> | 1.1928                       | 0.0500  | 0.0568        | 1.5197                             | 0.0910  | 0.1820 |
| T-PA    | 1.4575           | 0.0132  | <b>0.0450</b> | 1.6420                       | 0.0114  | <b>0.0375</b> | 1.1056                             | 0.3981  | 0.4180 |
| GP6     | 1.4362           | 0.0051  | <b>0.0379</b> | 1.4196                       | 0.0179  | <b>0.0379</b> | 1.4577                             | 0.0910  | 0.1820 |
| CPA1    | 1.4189           | 0.0011  | <b>0.0379</b> | 1.3138                       | 0.0033  | <b>0.0375</b> | 1.4426                             | 0.0573  | 0.1820 |
| MMP-9   | 1.3942           | 0.0122  | <b>0.0450</b> | 1.5136                       | 0.0043  | <b>0.0375</b> | 1.1451                             | 0.4813  | 0.4931 |
| IL2-RA  | 1.3935           | 0.0030  | <b>0.0379</b> | 1.3822                       | 0.0143  | <b>0.0375</b> | 1.3723                             | 0.0573  | 0.1820 |
| IL-12B  | 1.3780           | 0.0070  | <b>0.0379</b> | 1.5486                       | 0.0243  | <b>0.0379</b> | 1.2342                             | 0.1590  | 0.1964 |
| TFF3    | 1.3685           | 0.0076  | <b>0.0379</b> | 1.2113                       | 0.0338  | <b>0.0443</b> | 1.4524                             | 0.0671  | 0.1820 |
| VWF     | 1.3678           | 0.0076  | <b>0.0379</b> | 1.3410                       | 0.0222  | <b>0.0379</b> | 1.2822                             | 0.1590  | 0.1964 |
| AP-N    | 1.3555           | 0.0047  | <b>0.0379</b> | 1.3294                       | 0.0222  | <b>0.0379</b> | 1.4039                             | 0.0573  | 0.1820 |
| CHIT1   | 1.3418           | 0.0047  | <b>0.0379</b> | 1.2939                       | 0.0500  | 0.0568        | 1.4140                             | 0.0411  | 0.1820 |
| CD93    | 1.3304           | 0.0008  | <b>0.0379</b> | 1.2934                       | 0.0143  | <b>0.0375</b> | 1.3839                             | 0.0242  | 0.1820 |
| ST2     | 1.3296           | 0.0030  | <b>0.0379</b> | 1.4317                       | 0.0114  | <b>0.0375</b> | 1.1581                             | 0.1213  | 0.1960 |
| EN-RAGE | 1.3288           | 0.0169  | <b>0.0500</b> | 1.3847                       | 0.0305  | <b>0.0427</b> | 1.2412                             | 0.2050  | 0.2265 |
| SPON1   | 1.3282           | 0.0076  | <b>0.0379</b> | 1.3119                       | 0.0222  | <b>0.0379</b> | 1.3587                             | 0.0910  | 0.1820 |
| TR-AP   | 1.3258           | 0.0055  | <b>0.0379</b> | 1.3555                       | 0.0338  | <b>0.0443</b> | 1.3781                             | 0.0783  | 0.1820 |
| CCL15   | 1.3137           | 0.0060  | <b>0.0379</b> | 1.2205                       | 0.0275  | <b>0.0412</b> | 1.3429                             | 0.0910  | 0.1820 |
| ST1A1   | 1.3074           | 0.0024  | <b>0.0379</b> | 1.4220                       | 0.0118  | <b>0.0375</b> | 1.3526                             | 0.0671  | 0.1820 |
| TIMP4   | 1.3072           | 0.0070  | <b>0.0379</b> | 1.2771                       | 0.0143  | <b>0.0375</b> | 1.3158                             | 0.1590  | 0.1964 |
| AZU1    | 1.3067           | 0.0039  | <b>0.0379</b> | 1.3340                       | 0.0143  | <b>0.0375</b> | 1.2909                             | 0.1213  | 0.1960 |
| LIF-R   | 1.3004           | 0.0145  | <b>0.0450</b> | 1.3056                       | 0.0152  | <b>0.0375</b> | 1.3207                             | 0.1213  | 0.1960 |
| PDGFA   | 1.2988           | 0.0033  | <b>0.0379</b> | 1.3515                       | 0.0412  | <b>0.0495</b> | 1.4048                             | 0.0346  | 0.1820 |
| PECAM-1 | 1.2950           | 0.0036  | <b>0.0379</b> | 1.2810                       | 0.0179  | <b>0.0379</b> | 1.5383                             | 0.0671  | 0.1820 |
| PGLYRP1 | 1.2943           | 0.0097  | <b>0.0445</b> | 1.4064                       | 0.0222  | <b>0.0379</b> | 1.2557                             | 0.1590  | 0.1964 |
| MEPE    | 1.2928           | 0.0132  | <b>0.0450</b> | 1.3013                       | 0.0864  | 0.0864        | 1.2737                             | 0.0783  | 0.1820 |
| SELP    | 1.2824           | 0.0036  | <b>0.0379</b> | 1.3386                       | 0.0114  | <b>0.0375</b> | 1.2940                             | 0.0783  | 0.1820 |
| NRTN    | 1.2803           | 0.0064  | <b>0.0379</b> | 1.1821                       | 0.0305  | <b>0.0427</b> | 1.4130                             | 0.0573  | 0.1820 |
| MPO     | 1.2742           | 0.0097  | <b>0.0445</b> | 1.2814                       | 0.0143  | <b>0.0375</b> | 1.3080                             | 0.1392  | 0.1964 |
| IL-10RA | 1.2725           | 0.0059  | <b>0.0379</b> | 1.2351                       | 0.0118  | <b>0.0375</b> | 1.3135                             | 0.1053  | 0.1960 |
| KLK6    | 1.2679           | 0.0122  | <b>0.0450</b> | 1.4624                       | 0.0604  | 0.0634        | 1.1514                             | 0.1590  | 0.1964 |
| FGF-23  | 1.2570           | 0.0157  | <b>0.0474</b> | 1.2329                       | 0.0118  | <b>0.0375</b> | 1.3974                             | 0.2313  | 0.2491 |
| CDH5    | 1.2547           | 0.0036  | <b>0.0379</b> | 1.2409                       | 0.0090  | <b>0.0375</b> | 1.4702                             | 0.0910  | 0.1820 |
| U-PAR   | 1.2530           | 0.0142  | <b>0.0450</b> | 1.4439                       | 0.0864  | 0.0864        | 1.2140                             | 0.0486  | 0.1820 |
| CCL23   | 1.2522           | 0.0076  | <b>0.0379</b> | 1.2071                       | 0.0576  | 0.0621        | 1.2669                             | 0.0486  | 0.1820 |
| CD8A    | 1.2480           | 0.0124  | <b>0.0450</b> | 1.2829                       | 0.0380  | <b>0.0469</b> | 1.2830                             | 0.1590  | 0.1964 |
| PSP-D   | 1.2365           | 0.0122  | <b>0.0450</b> | 1.6285                       | 0.0025  | <b>0.0375</b> | 1.0308                             | 0.5262  | 0.5262 |
| CXCL9   | 1.2358           | 0.0145  | <b>0.0450</b> | 1.2279                       | 0.0380  | <b>0.0469</b> | 1.3673                             | 0.1590  | 0.1964 |
| IL-15RA | 1.2023           | 0.0124  | <b>0.0450</b> | 1.2376                       | 0.0243  | <b>0.0379</b> | 1.1905                             | 0.2050  | 0.2265 |

|                |        |        |               |        |        |               |        |        |        |
|----------------|--------|--------|---------------|--------|--------|---------------|--------|--------|--------|
| <b>TNFSF14</b> | 1.2016 | 0.0114 | <b>0.0450</b> | 1.1898 | 0.0243 | <b>0.0379</b> | 1.2558 | 0.1809 | 0.2111 |
| <b>FGF-19</b>  | 1.1882 | 0.0145 | <b>0.0450</b> | 1.1634 | 0.0576 | 0.0621        | 1.3390 | 0.1213 | 0.1960 |

- *FC (Fold change): Fold change in medians of COPD compared to control-derived fibroblasts.*
- *P-value: tested using Mann-Whitney U tests.*
- *FDR: P-value adjusted for multiple testing using Benjamini-Hochberg correction. Boldfaced when significant.*

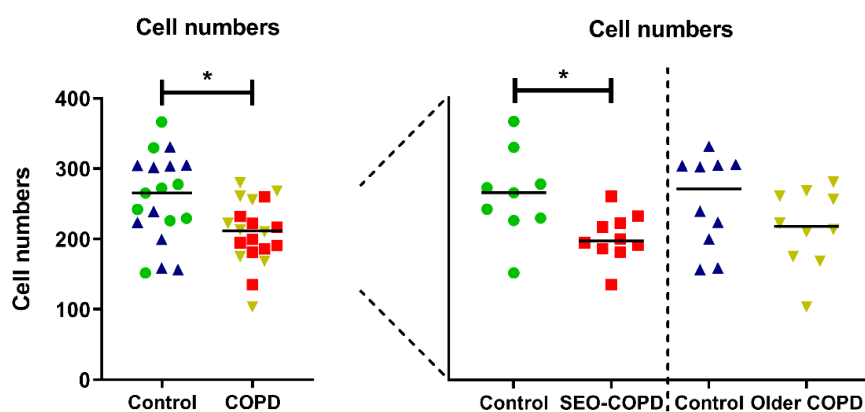

**Figure S1: Cell number differences between fibroblasts from COPD patients and controls at baseline.** Dot plots show total cell number at the end of culture of all 4 patient groups. Green = SEO-COPD-matched control, red = SEO-COPD, blue = older COPD-matched control, yellow = older, mild-moderate, COPD. Lines represent medians. Significant differences tested with Mann-Whitney U tests. \* P-value < 0.05.

### IQR of COPD-associated SASP proteins

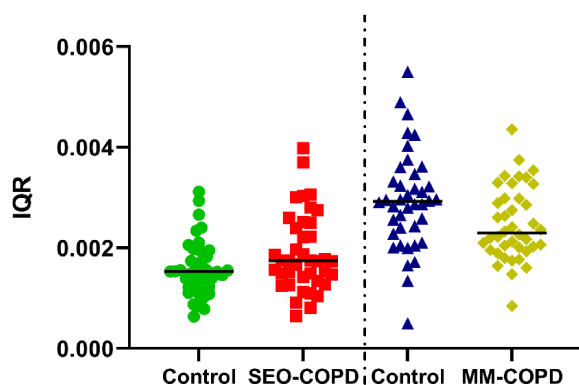

**Figure S2: Interquartile ranges of COPD-associated proteins per subgroup.** Interquartile ranges (IQR) of the 42 COPD-associated SASP proteins per subgroup. Green = SEO-COPD-matched controls, red = SEO-COPD, blue = older, mild-moderate COPD-matched controls, yellow = older, mild-moderate COPD.

## **References**

- 1 Noordhoek JA, Postma DS, Chong LL, *et al.* Different modulation of decorin production by lung fibroblasts from patients with mild and severe emphysema. *COPD*. 2005;**2** (suppl 1):17-25.
- 2 Silverman EK, Chapman HA, Drazen JM, *et al.* Genetic epidemiology of severe, early-onset chronic obstructive pulmonary disease. Risk to relatives for airflow obstruction and chronic bronchitis. *Am J Respir Crit Care Med*. 1998;**157** (suppl 6 Pt 1):1770-1778.
- 3 Chinta SJ, Woods G, Demaria M, *et al.* Cellular Senescence Is Induced by the Environmental Neurotoxin Paraquat and Contributes to Neuropathology Linked to Parkinson's Disease. *Cell Rep*. 2018;**22** (suppl 4):930-940.
- 4 Basisty N, Kale A, Jeon OH, *et al.* A proteomic atlas of senescence-associated secretomes for aging biomarker development. *PLoS Biol*. 2020;**18** (suppl 1):e3000599.
- 5 Coppe JP, Desprez PY, Krtolica A, *et al.* The senescence-associated secretory phenotype: the dark side of tumor suppression. *Annu Rev Pathol*. 2010;**5**:99-118.
